# Supplementary material for: Plasma oxidation of electrospun carbon nanofibers as supercapacitor electrodes
Source: Royal Society of Chemistry journal article supplement (doi:10.1039/c5ra04284d), 2015-01-01
Supplement: c5ra04284d1.pdf [file c5ra04284d1.pdf]

## Supporting Information for

Plasma oxidation of electrospun carbon nanofibers as supercapacitor electrodes

*Ching-Chang Lai and Chieh-Tsung Lo\**

Department of Chemical Engineering, National Cheng Kung University

No. 1, University Road, Tainan City 701, Taiwan

### X-ray diffraction (XRD)

The microstructure of carbon nanofibers was determined by a Rigaku RINT-2000 diffractometer with a source of filtered CuK $\alpha$  radiation. The measurement was performed at 40 kV and 40 mA with the diffraction angle ( $2\theta$ ) between 5° and 65° at a scan rate of 4 °/min.

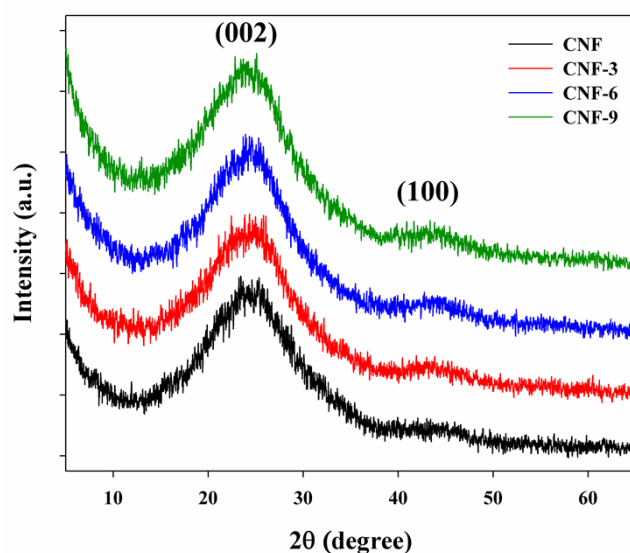

Figure S1. XRD patterns of plasma-treated carbon nanofibers.

### Fourier transform infrared spectroscopy (FTIR)

FTIR of the plasma-treated carbon nanofibers were characterized in dried KBr powder on JASCO spectrometer model FT/IR 4100.

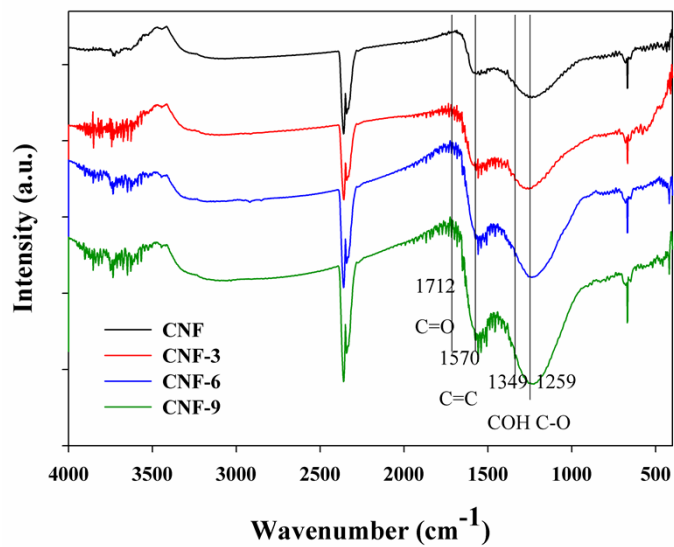

Figure S2. FTIR spectra of plasma-treated carbon nanofibers.

### N<sub>2</sub> adsorption isotherms

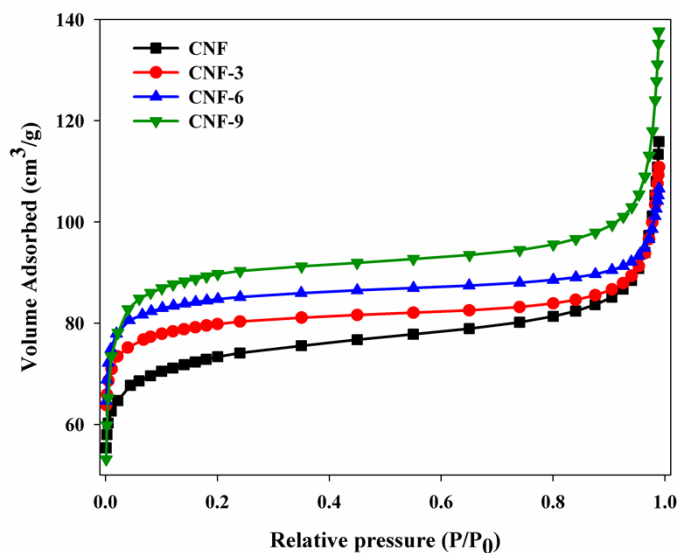

Figure S3. N<sub>2</sub> adsorption isotherms of plasma-treated carbon nanofibers
